# Supplementary material for: Effect of Eutrophication Control Methods on the Generation of Greenhouse Carbon Gases in Sediment
Source: MDPI journal article supplement (doi:10.3390/w14111705), 2022-05-26
Supplement: s1 [file s1]

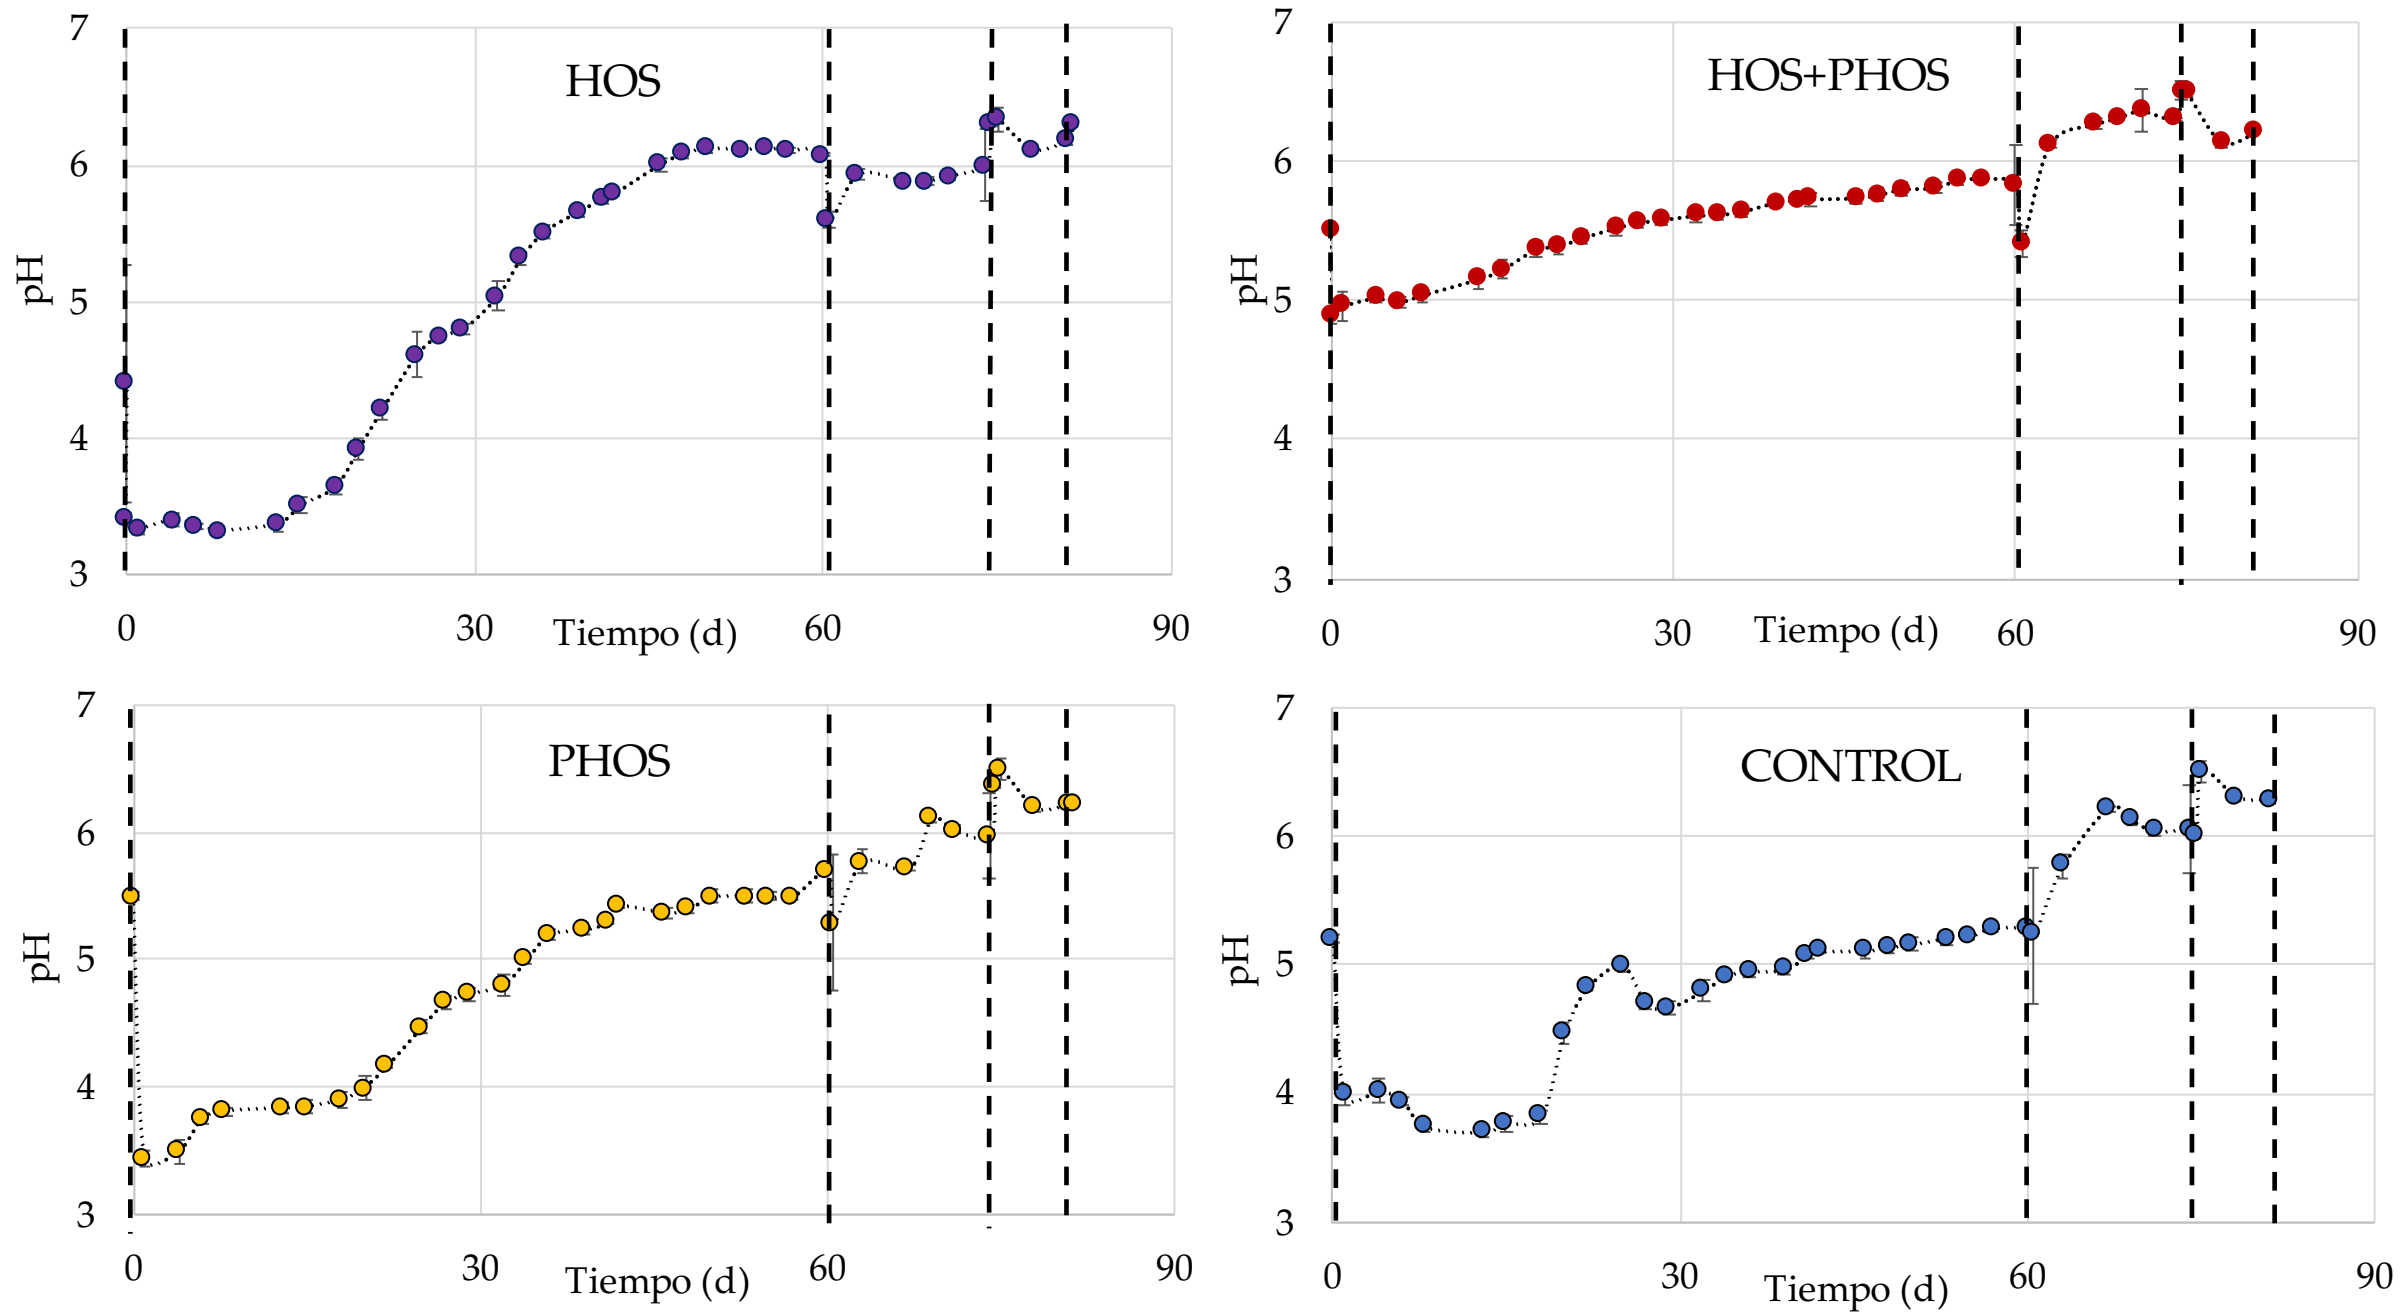

Figure S2: Time-dependent variations of pH in experimental reactors. [Sed] =  $14.1 \text{ g L}^{-1} \text{ dw}$ , [TOC] =  $[11,302 \text{ mmol m}^{-2}]$ .  $T = 28.2 \pm 1.5^{\circ}\text{C}$ . Vertical dotted lines indicate gas- and nutrient-application events. 0-60 d:  $\text{pH} = 4.9 \pm 0.7$ , 61-81 d:  $\text{pH} = 6.2 \pm 0.2$
